# Supplementary material for: The synthesis and multicolor luminescence of lanthanide doped Vernier lutetium oxyfluorides
Source: Royal Society of Chemistry journal article supplement (doi:10.1039/d1nj01773j), 2021-01-01
Supplement: d1nj01773j1.pdf [file d1nj01773j1.pdf]

## **The synthesis and multicolor luminescence of lanthanide doped Vernier lutetium oxyfluorides**

Bin Sang,<sup>a</sup> Jin Chen,<sup>a</sup> Jinle, Hou,<sup>a</sup> Yanxia Pan,<sup>c</sup> Konggang Qu,<sup>\*a</sup> Litong Wang,<sup>\*b</sup> and Rui-Qing  
Li<sup>\*a</sup>

<sup>a</sup> School of Chemistry and Chemical Engineering, Liaocheng University, Liaocheng 252059, P.R. China.

E-mail: qukonggang@lcu.edu.cn; liruiqing16@163.com.

<sup>b</sup> Institute of Applied Physics and Materials Engineering, University of Macau. Avenida da Universidade, Taipa, Macau SAR 999078, China.

E-mail: yb87833@um.edu.mo

<sup>c</sup> Offshore Oil Engineering Co. Ltd, Qingdao, 266520, P.R. China.

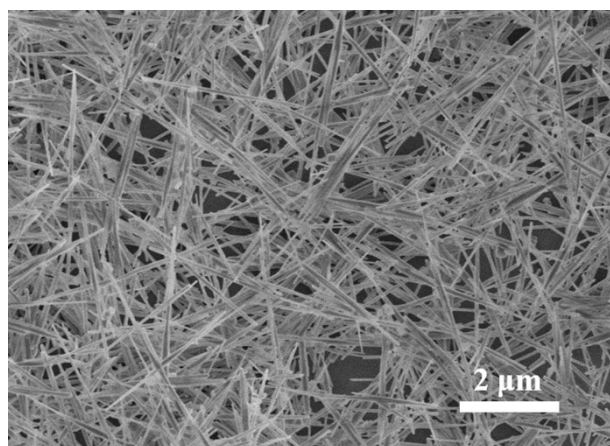

**Fig. S1** SEM image of  $\text{Lu(OH)}_{1.63}\text{F}_{1.37}$ .

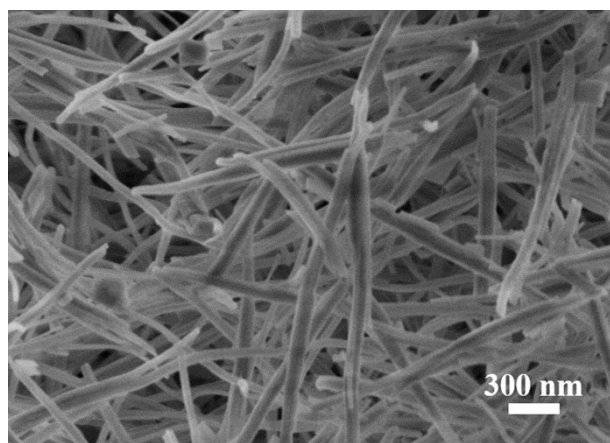

**Fig. S2** SEM image of V-LuOF.
